# Supplementary material for: Exploring working mechanism of an Implementation Strategy Bundle on the implementation of a lifestyle intervention for community-dwelling older adults: Process evaluation of a stepped wedge trial
Source: Research Square preprint supplement (doi:10.21203/rs.3.rs-8057836/v1), 2025-12-04
Supplement: Supplementary file 2 [file 8c86663c9f2205f98e6215ad.docx]

Exploring working mechanism of an Implementation Strategy Bundle on the implementation of a lifestyle intervention for community-dwelling older adults: Process evaluation of a stepped wedge trial

**Patricia J van der Laag*1, Berber G Dorhout2,3, Lara R Bos1, Cindy Veenhof2,4,5, Di-Janne JA Barten2,4, Lisette Schoonhoven1,6**

Additional file 2. Topic guide interview transitional period

**Introduction**
You have been working on implementing ProMuscle for 6–8 weeks now. We are very curious to hear how the past few weeks have gone—how far you’ve come, what has gone well, and what challenges you’ve encountered.

**Adoption**

- What motivated you to start implementing ProMuscle?
- To what extent do you find it important to implement ProMuscle?

**Reach**

- Have you already started offering ProMuscle?

**Adoption**

- What activities have you been focusing on so far? How has that been going?
- What are your next steps?
- Have you created an implementation plan?
  *Extra question:* Have you already collaborated with dietitians or physiotherapists?

**Fidelity**

- Has the implementation plan been adjusted?

**Adoption**

- Are there colleagues supporting you in the implementation? If yes, who? How is that support demonstrated?

**Satisfaction**

- Are you satisfied with how the implementation process has gone/is going? Why or why not?
  - What are you most satisfied with?
  - What are you least satisfied with?

**Barriers and Facilitators**

- What has worked well in the implementation? Please explain.
- What challenges have you encountered in the implementation of ProMuscle?
- Have you tried addressing the difficulties? How did that go?
- Is there anything we can support you with?

**Adoption**

- What did you expect from this period (the past six weeks)?
- Have your expectations been met? Why or why not?

**Context**

- Do you think there are certain factors within your organization and/or community that could influence the implementation? If so, which ones?
- Have there been any changes in the local or national environment (policy) that could impact the implementation?
  *Follow-up question:* Do you think GALA/SPUK could have an impact on the implementation?

**Stakeholder Engagement**

- Have you involved specific people (stakeholders) in the implementation? Who, why, and how?
- Were you able to convince stakeholders of its importance?
- Did you receive support from stakeholders?
  Examples of stakeholders: colleagues, community sports coach, local newspaper, supermarket, hairdresser, community center, church.

**Reach: Recruitment**

- Have you started recruiting older adults?
- How is that going?
- What actions have you taken to recruit older adults?
- Have you experienced any difficulties? Can you elaborate?
- Were any actions successful? Which ones?

**Reach**

- How many older adults have participated so far?
- If yes: What are the characteristics of these participants?
- What were the participants' reactions to the program?

**Fidelity**

- Have all activities been carried out as described in the handbook?
- Have adjustments been made to ProMuscle? If yes, which ones?

**Reach**

- If no: When do you hope/expect to start?

**Fidelity**

- How has your overall experience been with ProMuscle (e.g., theory, structure)?
- Does ProMuscle need adjustments to remain feasible in the future?

**Fit**

- Does ProMuscle fit well within your practice?
- Do you have any suggestions to improve ProMuscle, recruitment, or implementation?

Additional file 2b. Topic guide group interviews (42 weeks after start study)

Implementation process and ISB

**Introductory Question**
Are you satisfied with your progress in implementing ProMuscle?
What did you think about the implementation process over the past year?

**Expectations**
What were your expectations for the implementation process?

**Process**
How did you approach the process?

**Outcomes**
What has the implementation brought you?
You have access to the implementation toolbox on promuscle.nl.
Before accessing the tool, a questionnaire needed to be completed to receive a personalized advice package.
We are curious to hear your thoughts about the toolbox and whether it contributed to the implementation.
*Toolbox image*

**Future Use**
Do you think the toolbox can help other professionals implement ProMuscle?

**Deep Dive into Toolbox Actions**
I’d like to delve a bit deeper into the actions described in the toolbox.

**Discussion of Themes**
All actions from the tool have been compiled into this document.
What did you think about the actions described in the toolbox?

**General Remarks**
Are there any general comments about the toolbox or the implementation process?

ProMuscle

**Introductory Question**
I’m very curious to hear what you think of ProMuscle and what motivated you to start working with this program.
What do you think of the manuals?
Have you already offered the program? What are your experiences?
Does ProMuscle, as it is currently described, fit into daily care, or does it need adjustments?

**Recruitment**
How did you experience the recruitment of older adults?

**Online Campaign**
In November, we started an online campaign. Did this contribute to new registrations?

**Integration into Practice**
To what extent has ProMuscle become part of your daily practice/organization?
